# Supplementary material for: Bifidobacterium breve UCC2003 metabolises the human milk oligosaccharides lacto-N-tetraose and lacto-N-neo-tetraose through overlapping, yet distinct pathways
Source: PubMed Central journal article supplement (PMC5144078; doi:10.1038/srep38560), 2016-12-08
Supplement: srep38560-s1.pdf [file srep38560-s1.pdf]

**Title:** *Bifidobacterium breve* UCC2003 metabolises the human milk oligosaccharides lacto-N-tetraose and lacto-N-neo-tetraose through overlapping, yet distinct pathways.

**Authors:** Kieran James<sup>1,2</sup>, Mary O’Connell Motherway<sup>2</sup>, Francesca Bottacini<sup>2</sup>, Douwe van Sinderen<sup>1,2\*</sup>

**Affiliation(s):** <sup>1</sup> School of Microbiology & <sup>2</sup>APC Microbiome Institute,  
University College Cork, Cork, Ireland

\* **Correspondence:** [d.vansinderen@ucc.ie](mailto:d.vansinderen@ucc.ie)

| Purpose                                                    | Primer                                                                                                                   | Sequence (5'-3')                                                                                                                                                                                        |
|------------------------------------------------------------|--------------------------------------------------------------------------------------------------------------------------|---------------------------------------------------------------------------------------------------------------------------------------------------------------------------------------------------------|
| Cloning of Bbr_1556 in pNZ8150                             | 1556F<br>1556R                                                                                                           | <i>tgc</i> atcc <b>agct</b> gatgatcaccatcaccatcaccatcaccatcacaacgggtcaaacatctctgca<br><i>tgc</i> catc <b>ctag</b> aggattggaagcgcagatggc                                                                 |
| Cloning of internal 465bp fragment of Bbr_0530 in pOR119   | IM530F<br>IM530R                                                                                                         | ctggtc <b>aa</b> gcttgaaggagaccggcatcaagg<br>ctggtc <b>ctctag</b> agcttggaaaggcttggcgc                                                                                                                  |
| Cloning of internal 488bp fragment of Bbr_1554 in pOR119   | IM1554F<br>IM1554R                                                                                                       | ctggtc <b>aa</b> gcttgaaggagaccggcatcaagg<br>ctggtc <b>ctctag</b> agcttggaaaggcttggcgc                                                                                                                  |
| Cloning of internal 443bp fragment of Bbr_1556 in pOR119   | IM1556F<br>IM1556R                                                                                                       | ctggtc <b>aa</b> gcttgaatacctcgccatccc<br>ctggtc <b>ctctag</b> accagtgacttcatccagtcgc                                                                                                                   |
| Amplification of <i>tetW</i>                               | tetWFw<br>tetWRv                                                                                                         | tcagctgtcgacatgctcatgtacggtaaggaagca<br>gcgacggtcgaccataacttctgattgtgccg                                                                                                                                |
| Confirmation of site specific homologous recombination     | 526confirm1<br>526confirm2<br>530confirm1<br>530confirm2<br>1554confirm1<br>1554confirm2<br>1556confirm1<br>1556confirm2 | gcgtagctgttacaatggc<br>gccatttccaaccctctc<br>gaggaaaggagaacagacgatg<br>gcgaaaggaaatggcttcatag<br>ctgctgacgccaatgccgacaag<br>ccgctactgcaggtcgccatcatcaagcac<br>gcagctcagcagacatccgc<br>gcgcgcgagtcggtgac |
| Cloning of 2086bp fragment containing Bbr_0529 into pNZ44  | 529pNZ44F<br>529pNZ44R                                                                                                   | ctggtc <b>ctg</b> caggactccatttgcccacagtag<br>cgagc <b>ctctag</b> agatttctctcgacactg                                                                                                                    |
| Cloning of p44-529 in pBC1.2                               | P44 Forward                                                                                                              | ctggtcc <b>ggatcc</b> gagataatgccgactgtac                                                                                                                                                               |
| Cloning of 1637bp fragment containing Bbr_1554 into PBC1.2 | 1554PBC1.2F<br>1554PBC1.2R                                                                                               | ctggtccggatccgccggaacaacagtctgc<br>cgagctctagaattcaccgtttggattattgg                                                                                                                                     |
| Cloning of 2360bp fragment containing Bbr_1556 into PBC1.2 | 1556PBC1.2F<br>1556PBC1.2R                                                                                               | ctggtccggatcccccacgaggtggacaagt<br>cgagctctagagaaatcacaatcgagcc                                                                                                                                         |

Restriction sites incorporated into oligonucleotide primer sequences are indicated in bold, and His-tag sequences incorporated into nucleotide primer sequences are indicated in italics.

### Supplementary Table S1: Oligonucleotide primers used in this work.

| Strain or plasmid                           | Relevant Features                                                                                                                  | Reference or Source |
|---------------------------------------------|------------------------------------------------------------------------------------------------------------------------------------|---------------------|
| <b>Strains</b>                              |                                                                                                                                    |                     |
| <i>Escherichia coli</i> strains             |                                                                                                                                    |                     |
| <i>E. coli</i> EC101                        | Cloning host, repA <sup>+</sup> km <sup>+</sup>                                                                                    | 1                   |
| <i>E. coli</i> EC101-pNZ-M.BbrII + M.BbrIII | EC101 harbouring pNZ8048 derivative containing <i>bbrIIM</i> and <i>bbrIIIM</i>                                                    | 2                   |
| <i>E. coli</i> XL1-Blue                     | <i>supE44 hsdR17 recA1 gyrA96 thi relA1 lac F</i> [ <i>proAB+ lacIq lacZAM15 Tn10(Tet<sup>r</sup>)</i> ]                           | Stratagene          |
| <i>E. coli</i> XL1-blue-pBC1.2-529          | XL1-blue containing pBC1.2-529                                                                                                     | This study          |
| <i>Lactococcus lactis</i> strains           |                                                                                                                                    |                     |
| <i>L. lactis</i> NZ9000                     | MG1363, pepN:nisRK, nisin-inducible overexpression host                                                                            | 3                   |
| <i>L. lactis</i> NZ9700                     | Nisin-producing strain                                                                                                             | 3                   |
| <i>L. lactis</i> NZ9000-pNZ-lacZ2           | NZ9000 conatining pNZ-010                                                                                                          | 4                   |
| <i>L. lactis</i> NZ9000-pNZ-IntA            | NZ9000 conatining pNZ-529                                                                                                          | 4                   |
| <i>L. lactis</i> NZ9000-pNZ-lacZ6           | NZ9000 conatining pNZ-1552                                                                                                         | 4                   |
| <i>L. lactis</i> NZ9000-pNZ-nahA            | NZ9000 conatining pNZ-1556                                                                                                         | This study          |
| <i>L. lactis</i> NZ9000-pNZ44-IntA          | NZ9000 containing pNZ44-529                                                                                                        | This study          |
| <i>Bifidobacterium</i> sp. Strains          |                                                                                                                                    |                     |
| <i>B. breve</i> UCC2003                     | Isolate from nursling stool                                                                                                        | 5                   |
| <i>B. breve</i> UCC2003-lacZ2               | Tn5-transposon mutant in Bbr_0010 of UCC2003                                                                                       | 6                   |
| <i>B. breve</i> UCC2003-IntP1               | pORI19-tet-bbr_0527 insertion mutant of UCC2003                                                                                    | 4                   |
| <i>B. breve</i> UCC2003-IntA                | pORI19-tet-bbr_0529 insertion mutant of UCC2003                                                                                    | 4                   |
| <i>B. breve</i> UCC2003-lacS                | pORI19-tet-bbr_1551 insertion mutant of UCC2003                                                                                    | 4                   |
| <i>B. breve</i> UCC2003-lacZ6               | pORI19-tet-bbr_1552 insertion mutant of UCC2003                                                                                    | 4                   |
| <i>B. breve</i> UCC2003-InbP                | pORI19-tet-bbr_1587 insertion mutant of UCC2003                                                                                    | 7                   |
| <i>B. breve</i> UCC2003-IntS                | pORI19-tet-bbr_0530 insertion mutant of UCC2003                                                                                    | This study          |
| <i>B. breve</i> UCC2003-nahS                | pORI19-tet-bbr_1554 insertion mutant of UCC2003                                                                                    | This study          |
| <i>B. breve</i> UCC2003-nahA                | pORI19-tet-bbr_1556 insertion mutant of UCC2003                                                                                    | This study          |
| <i>B. breve</i> UCC2003-IntA-PBC1.2-IntA    | pORI19-tet-529 insertion mutant of UCC2003 harbouring complementation construct pBC1.2-529                                         | This study          |
| <i>B. breve</i> UCC2003-nahS-PBC1.2-nahS    | pORI19-tet-1554 insertion mutant of UCC2003 harbouring complementation construct pBC1.2-1554                                       | This study          |
| <i>B. breve</i> UCC2003-nahA-PBC1.2-nahA    | pORI19-tet-1556 insertion mutant of UCC2003 harbouring complementation construct pBC1.2-1556                                       | This study          |
| <i>B. breve</i> UCC2004                     | Isolate from infant faeces                                                                                                         | UCC                 |
| <i>B. breve</i> JCM7017                     | Isolate from human faeces                                                                                                          | JCM                 |
| <i>B. breve</i> JCM7019                     | Isolate from infant faeces                                                                                                         | JCM                 |
| <i>B. breve</i> NCFB2258                    | Isolate from infant intestine                                                                                                      | NCFB                |
| <i>B. breve</i> UCC2005                     | Isolate from nursling stool                                                                                                        | UCC                 |
| <i>B. breve</i> 8815                        | Isolate from human faeces                                                                                                          | NCIMB               |
| <i>B. breve</i> 11815                       | Isolate from infant intestine                                                                                                      | NCIMB               |
| <i>B. breve</i> NIZO658                     | Isolate from human faeces                                                                                                          | NIZO                |
| <i>B. breve</i> UCC2006                     | Mother's milk                                                                                                                      | UCC                 |
| <i>B. breve</i> UCC2007                     | Mother's milk                                                                                                                      | UCC                 |
| <i>B. breve</i> UCC2008                     | Isolate from infant/adult faeces                                                                                                   | UCC                 |
| <i>B. breve</i> LMG13208                    | Isolate from infant faeces                                                                                                         | LMG                 |
| <i>B. breve</i> UCC2009                     | Isolate from infant/adult faeces                                                                                                   | UCC                 |
| <i>B. breve</i> UCC2010                     | Mother's milk                                                                                                                      | UCC                 |
| <i>B. breve</i> UCC2011                     | Mother's milk                                                                                                                      | UCC                 |
| <b>Plasmids</b>                             |                                                                                                                                    |                     |
| pAM5                                        | pBC1-puC19-Tet <sup>r</sup>                                                                                                        | 8                   |
| pORI19                                      | Em <sup>r</sup> , repA <sup>+</sup> , ori <sup>+</sup> , cloning vector                                                            | 1                   |
| pORI19-tet-IntS                             | Internal 465 bp fragment of <i>bbr_0530</i> and tetW cloned in pORI19                                                              | This study          |
| pORI19-tet-nahS                             | Internal 443 bp fragment of <i>bbr_1554</i> and tetW cloned in pORI19                                                              | This study          |
| pORI19-tet-nahA                             | Internal 443 bp fragment of <i>bbr_1556</i> and tetW cloned in pORI19                                                              | This study          |
| pNZ8150                                     | Cm <sup>r</sup> , nisin inducible translational fusion vector                                                                      | 9                   |
| pNZ-nahA                                    | Cm <sup>r</sup> , pNZ8150 derivative containing translational fusion of Bbr_1556 encoding DNA fragment to nisin inducible promoter | This study          |
| pNZ44                                       | pNZ8048 containing constitutive p44 promoter from Lactococcal chromosome                                                           | 10                  |
| pNZ44-IntA                                  | pNZ44 harbouring Bbr_0529 downstream of p44 promoter                                                                               | This study          |
| pBC1.2                                      | pBC1-pSC101-Cm <sup>r</sup>                                                                                                        | 8                   |
| pBC1.2-IntA                                 | pBC1-pSC101-Cmr harbouring Bbr_0529 downstream of p44 promoter                                                                     | This study          |
| pBC1.2-nahS                                 | pBC1-pSC101-Cmr harbouring Bbr_1554                                                                                                | This study          |
| pBC1.2-nahA                                 | pBC1-pSC101-Cmr harbouring Bbr_1556                                                                                                | This study          |

Cm<sup>r</sup>, Em<sup>r</sup>, Km<sup>r</sup> and Tet<sup>r</sup>, resistance to chloramphenicol, erythromycin, kanamycin and tetracycline, respectively.

Collection of the University of Goteborg; CIP, Collection de l'Institut Pasteur; DSM, German Collection of Microorganisms and Cell Cultures; JCM, Japan Collection of Microorganisms; LMG, Belgian Co-ordinated Collection of Microorganisms; NCDO, National Collection of Dairy Organisms; NCFB, National Collection of Food Bacteria; NCIMB, National Collection of Industrial and Marine Bacteria; NCTC, National Collection of Type Cultures; UCC, University College Cork Culture Collection.

## Supplementary Table S2: Bacterial plasmids and strains used in this work.

| Gene ID                                                           | Gene Name | Location of Activity | Function in HMO Metabolism                                                                                                    |
|-------------------------------------------------------------------|-----------|----------------------|-------------------------------------------------------------------------------------------------------------------------------|
| <b><i>Bifidobacterium breve</i> UCC2003</b>                       |           |                      |                                                                                                                               |
| Bbr_1556                                                          | nahA      | Intracellular        | nagZ Beta-N-acetylhexosaminidase; hydrolyses Lacto-N-Triose at GlcNAc $\beta$ 1-3Gal residue, releasing GlcNAc and galactose. |
| Bbr_1587                                                          | lnbP      | Intracellular        | Lacto-N-biose phosphorylase; hydrolyses LNB, releasing GlcNAc and phosphorylated galactose.                                   |
| <b><i>Bifidobacterium bifidum</i> PRL2010</b>                     |           |                      |                                                                                                                               |
| BBPR_1438                                                         | lnbB      | Extracellular        | Lacto-N-biosidase; hydrolyses LNT at its GlcNAc $\beta$ 1-3Gal residue, releasing LNB and lactose.                            |
| <b><i>Bifidobacterium longum</i> subsp. <i>longum</i> JCM1217</b> |           |                      |                                                                                                                               |
| BLLJ_1505                                                         | lnbX      | Extracellular        | Lacto-N-biosidase; hydrolyses LNT at its GlcNAc $\beta$ 1-3Gal residue, releasing LNB and lactose.                            |

**Supplementary Table S3:** Locus tags, names and product functions of *B. breve* UCC2003 and *B. bifidum* PRL2010 genes selected for bioinformatic analysis of LN(n)T/LNB utilisation-associated homologs across the *Bifidobacterium* genus.

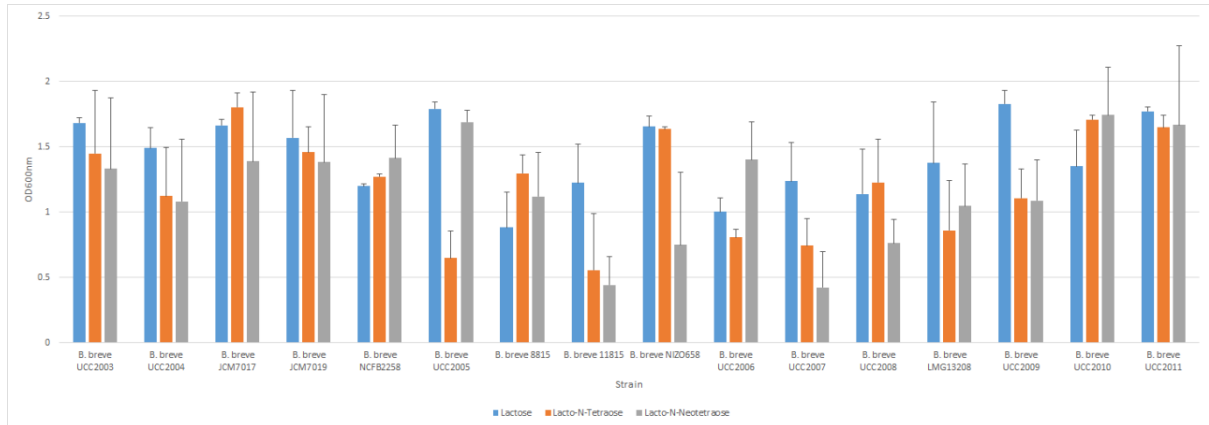

**Supplementary Figure S1:** Final OD<sub>600nm</sub> values (measured using PowerWave microplate spectrophotometer) after 24 hours of growth of 16 *B. breve* strains in modified MRS containing 1 % (wt/vol) LNT, 1 % (wt/vol) LNnT or 1 % (wt/vol) lactose as the sole carbon source.

The results are the mean values obtained manually from two separate experiments (due to the limited availability of certain carbohydrates). Error bars represent the standard deviation.

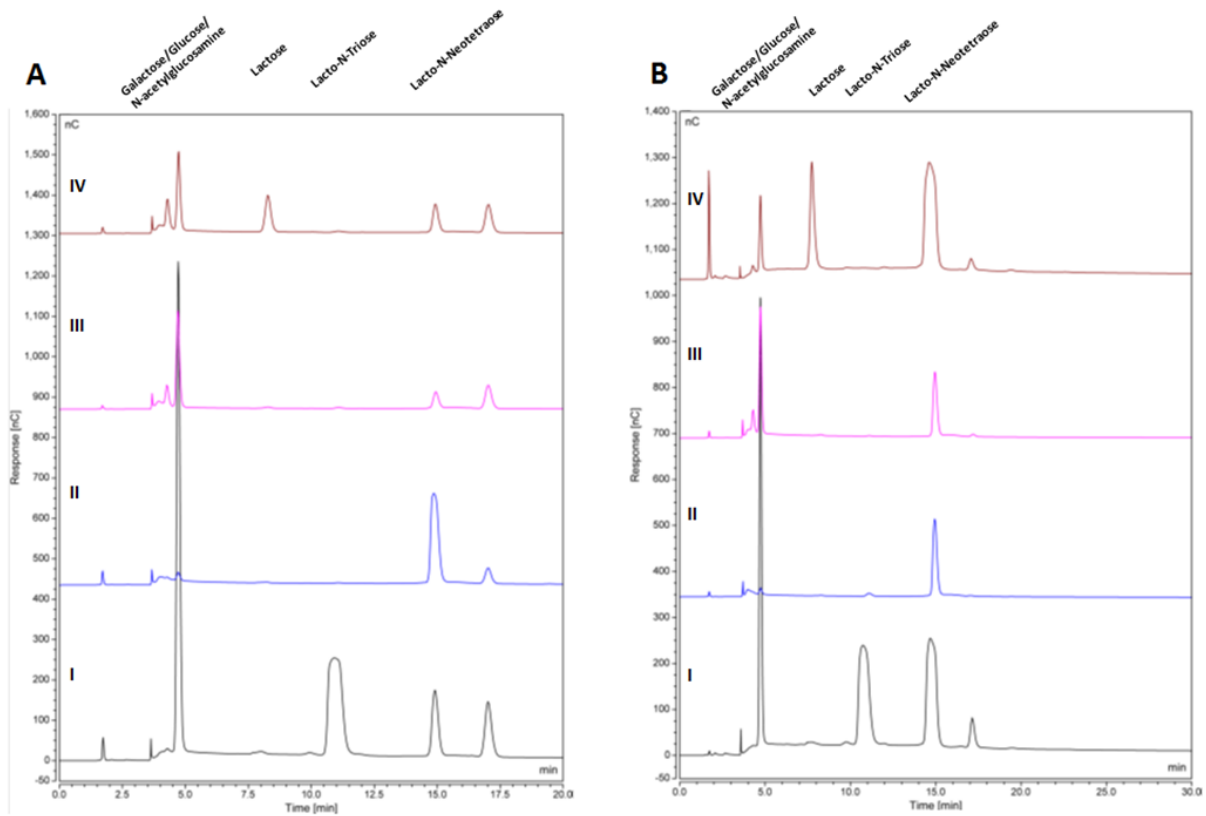

**Supplementary Figure S2:** (A) HPAEC chromatogram profiles of LNnT, when incubated in MOPS buffer (pH7) with: (I) LacZ2 alone, (II) NahA alone, (III) LacZ2 and NahA together, and (IV) LacZ2, followed by a denaturation step and the subsequent addition of NahA. (B) HPAEC chromatogram profiles of LNnT, when incubated in MOPS buffer (pH7) with: (I) LacZ6 alone, (II) NahA alone, (III) LacZ6 and NahA together, and (IV) LacZ6, followed by a denaturation step and the subsequent addition of NahA.

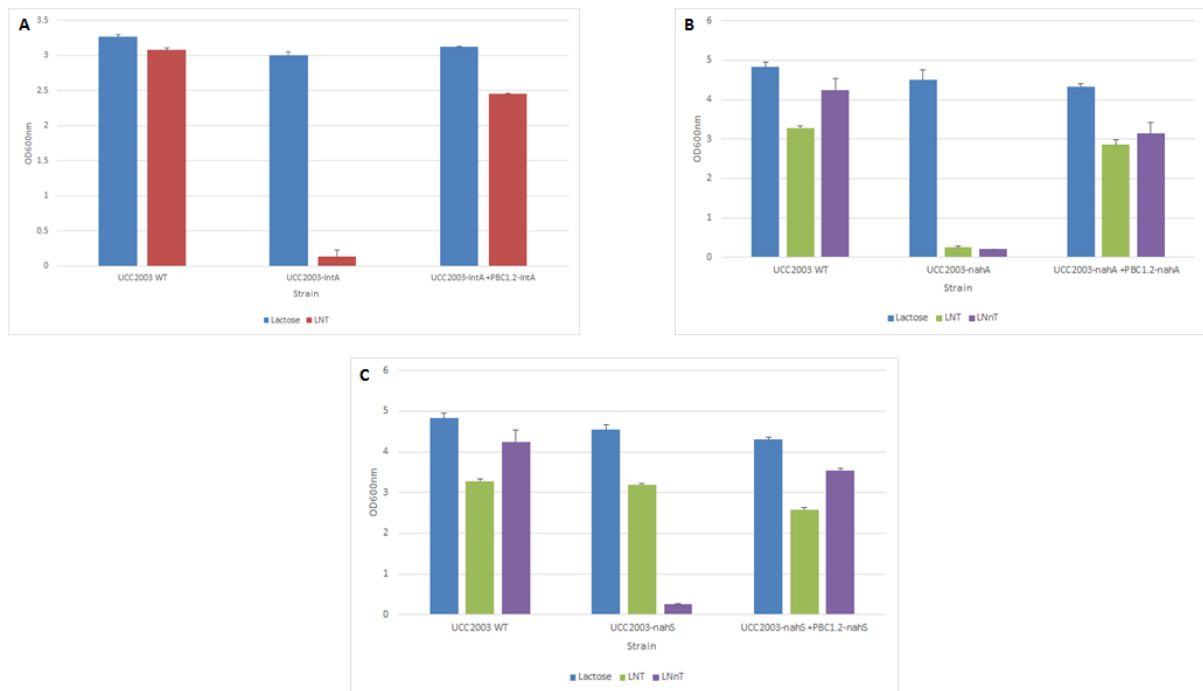

**Supplementary Figure S3:** (A) Final OD600 values (measured manually) after 24 hours of growth of wild type *B. breve* UCC2003, the insertion mutant *B. breve* UCC2003-lntA, and the complementation strain *B. breve* UCC2003-lntA+PBC1.2-lntA in modified MRS containing 1 % (wt/vol) lactose or 1 % (wt/vol) LNT as the sole carbon source. The results are the mean values obtained from two separate experiments\*. Error bars represent the standard deviation. (B) Final OD600 values (measured manually) after 24 hours of growth of wild type *B. breve* UCC2003, the insertion mutant *B. breve* UCC2003-nahA, and the complementation strain *B. breve* UCC2003-nahA+PBC1.2-nahA in modified MRS containing 1 % (wt/vol) lactose or 1 % (wt/vol) LNT as the sole carbon source. The results are the mean values obtained from two separate experiments\*. Error bars represent the standard deviation. (C) Final OD600 values (measured manually) after 24 hours of growth of wild type *B. breve* UCC2003, the insertion mutant *B. breve* UCC2003-nahS, and the complementation strain *B. breve* UCC2003-nahS+PBC1.2-nahS in modified MRS containing 1 % (wt/vol) lactose or 1 % (wt/vol) LNT as the sole carbon source. The results are the mean values obtained from two separate experiments\*. Error bars represent the standard deviation.

\*Experiments were carried out in duplicate due to a limited amount of carbohydrate material.

## References:

- 1 Law, J. *et al.* A system to generate chromosomal mutations in *Lactococcus lactis* which allows fast analysis of targeted genes. *J Bacteriol* **177**, 7011-7018 (1995).
- 2 O'Connell Motherway, M., O'Driscoll, J., Fitzgerald, G. F. & Van Sinderen, D. Overcoming the restriction barrier to plasmid transformation and targeted mutagenesis in *Bifidobacterium breve* UCC2003. *Microb Biotechnol* **2**, 321-332, DOI:10.1111/j.1751-7915.2008.00071.x (2009).
- 3 de Ruyter, P. G., Kuipers, O. P. & de Vos, W. M. Controlled gene expression systems for *Lactococcus lactis* with the food-grade inducer nisin. *Applied and environmental microbiology* **62**, 3662-3667 (1996).
- 4 O'Connell Motherway, M., Kinsella, M., Fitzgerald, G. F. & van Sinderen, D. Transcriptional and functional characterization of genetic elements involved in galacto-oligosaccharide utilization by *Bifidobacterium breve* UCC2003. *Microb Biotechnol* **6**, 67-79, DOI:10.1111/1751-7915.12011 (2013).
- 5 Maze, A., O'Connell-Motherway, M., Fitzgerald, G. F., Deutscher, J. & van Sinderen, D. Identification and characterization of a fructose phosphotransferase system in *Bifidobacterium breve* UCC2003. *Applied and environmental microbiology* **73**, 545-553, DOI:10.1128/aem.01496-06 (2007).
- 6 Ruiz, L., Motherway, M. O., Lanigan, N. & van Sinderen, D. Transposon mutagenesis in *Bifidobacterium breve*: construction and characterization of a Tn5 transposon mutant library for *Bifidobacterium breve* UCC2003. *PLoS One* **8**, e64699, DOI:10.1371/journal.pone.0064699 (2013).
- 7 Egan, M. *et al.* Cross-feeding by *Bifidobacterium breve* UCC2003 during co-cultivation with *Bifidobacterium bifidum* PRL2010 in a mucin-based medium. *BMC microbiology* **14**, 282, DOI:10.1186/s12866-014-0282-7 (2014).
- 8 Álvarez-Martín, P., O'Connell-Motherway, M., van Sinderen, D. & Mayo, B. Functional analysis of the pBC1 replicon from *Bifidobacterium catenulatum* L48. *Applied microbiology and biotechnology* **76**, 1395-1402, DOI:10.1007/s00253-007-1115-5 (2007).
- 9 Mierau, I. & Kleerebezem, M. 10 years of the nisin-controlled gene expression system (NICE) in *Lactococcus lactis*. *Applied microbiology and biotechnology* **68**, 705-717, DOI:10.1007/s00253-005-0107-6 (2005).
- 10 McGrath, S., Fitzgerald, G. F. & van Sinderen, D. Improvement and optimization of two engineered phage resistance mechanisms in *Lactococcus lactis*. *Applied and environmental microbiology* **67**, 608-616, DOI:10.1128/aem.67.2.608-616.2001 (2001).
